# Supplementary material for: The effect of sex on vestibular schwannoma incidence varies across the lifespan and modifies associations with race/ethnicity
Source: Research Square preprint supplement (doi:10.21203/rs.3.rs-7645100/v1), 2025-09-29
Supplement: Supplementary file 1 [file 5c1a6222121529ac5cacf345.docx]

**Supplementary Table 1.** Vestibular schwannoma incidence rate ratios and 95% confidence intervals for the joint effects of sex, race and ethnicity, and their interactions from Poisson regression models stratified by 10-year age intervals. (CBTRUS: Data provided by CDC’s National Program of Cancer Registries and NCI’s Surveillance, Epidemiology and End Results Program, 2004-2021).

|  | 0-9 | | | 10-19 | | | 20-29 | | | 30-39 | | | 40-49 | | | 50-59 | | | 60-69 | | | 70-79 | | | 80+ | | |
| --- | --- | --- | --- | --- | --- | --- | --- | --- | --- | --- | --- | --- | --- | --- | --- | --- | --- | --- | --- | --- | --- | --- | --- | --- | --- | --- | --- |
| **Characteristic** | **IRR**1 | **95% CI**1 | **p-value** | **IRR**1 | **95% CI**1 | **p-value** | **IRR**1 | **95% CI**1 | **p-value** | **IRR**1 | **95% CI**1 | **p-value** | **IRR**1 | **95% CI**1 | **p-value** | **IRR**1 | **95% CI**1 | **p-value** | **IRR**1 | **95% CI**1 | **p-value** | **IRR**1 | **95% CI**1 | **p-value** | **IRR**1 | **95% CI**1 | **p-value** |
| Age | 1.27 | 1.19, 1.36 | <0.001 | 1.11 | 1.08, 1.14 | <0.001 | 1.12 | 1.11, 1.14 | <0.001 | 1.07 | 1.06, 1.08 | <0.001 | 1.06 | 1.05, 1.06 | <0.001 | 1.04 | 1.03, 1.04 | <0.001 | 1.02 | 1.01, 1.02 | <0.001 | 0.97 | 0.97, 0.98 | <0.001 | 0.87 | 0.85, 0.88 | <0.001 |
| Sex |  |  |  |  |  |  |  |  |  |  |  |  |  |  |  |  |  |  |  |  |  |  |  |  |  |  |  |
| Female | — | — |  | — | — |  | — | — |  | — | — |  | — | — |  | — | — |  | — | — |  | — | — |  | — | — |  |
| Male | 1.02 | 0.70, 1.49 | >0.9 | 0.81 | 0.69, 0.94 | 0.006 | 0.81 | 0.74, 0.88 | <0.001 | 0.87 | 0.82, 0.92 | <0.001 | 0.94 | 0.90, 0.98 | 0.002 | 0.92 | 0.90, 0.95 | <0.001 | 1.01 | 0.98, 1.04 | 0.5 | 1.11 | 1.07, 1.16 | <0.001 | 1.14 | 1.06, 1.22 | <0.001 |
| Race/ethnicity |  |  |  |  |  |  |  |  |  |  |  |  |  |  |  |  |  |  |  |  |  |  |  |  |  |  |  |
| Non-Hispanic White | — | — |  | — | — |  | — | — |  | — | — |  | — | — |  | — | — |  | — | — |  | — | — |  | — | — |  |
| Non-Hispanic Black | 0.53 | 0.23, 1.06 | 0.10 | 0.39 | 0.27, 0.53 | <0.001 | 0.29 | 0.23, 0.36 | <0.001 | 0.34 | 0.30, 0.40 | <0.001 | 0.38 | 0.34, 0.42 | <0.001 | 0.42 | 0.38, 0.45 | <0.001 | 0.42 | 0.38, 0.46 | <0.001 | 0.45 | 0.39, 0.50 | <0.001 | 0.46 | 0.37, 0.57 | <0.001 |
| Sex * Race/ethnicity |  |  |  |  |  |  |  |  |  |  |  |  |  |  |  |  |  |  |  |  |  |  |  |  |  |  |  |
| Male * Non-Hispanic Black | 1.66 | 0.66, 4.45 | 0.3 | 1.20 | 0.75, 1.92 | 0.4 | 1.16 | 0.83, 1.62 | 0.4 | 0.83 | 0.66, 1.04 | 0.11 | 0.93 | 0.79, 1.08 | 0.3 | 0.82 | 0.72, 0.94 | 0.003 | 0.90 | 0.78, 1.03 | 0.12 | 0.78 | 0.64, 0.95 | 0.014 | 1.12 | 0.79, 1.57 | 0.5 |
| 1IRR = Incidence Rate Ratio, CI = Confidence Interval | | | | | | | | | | | | | | | | | | | | | | | | | | | |

**Supplementary Table 2.** Microscopically confirmed Vestibular schwannoma incidence rate ratios and 95% confidence intervals for the joint effects of sex, race and ethnicity, and their interactions from Poisson regression models stratified by 10-year age intervals. (CBTRUS: Data provided by CDC’s National Program of Cancer Registries and NCI’s Surveillance, Epidemiology and End Results Program, 2004-2021).

|  | 0-9 | | | 10-19 | | | 20-29 | | | 30-39 | | | 40-49 | | | 50-59 | | | 60-69 | | | 70-79 | | | 80+ | | |
| --- | --- | --- | --- | --- | --- | --- | --- | --- | --- | --- | --- | --- | --- | --- | --- | --- | --- | --- | --- | --- | --- | --- | --- | --- | --- | --- | --- |
| **Characteristic** | **IRR**1 | **95% CI**1 | **p-value** | **IRR**1 | **95% CI**1 | **p-value** | **IRR**1 | **95% CI**1 | **p-value** | **IRR**1 | **95% CI**1 | **p-value** | **IRR**1 | **95% CI**1 | **p-value** | **IRR**1 | **95% CI**1 | **p-value** | **IRR**1 | **95% CI**1 | **p-value** | **IRR**1 | **95% CI**1 | **p-value** | **IRR**1 | **95% CI**1 | **p-value** |
| Age | 1.26 | 1.12, 1.44 | <0.001 | 1.19 | 1.15, 1.23 | <0.001 | 1.12 | 1.10, 1.14 | <0.001 | 1.05 | 1.04, 1.06 | <0.001 | 1.04 | 1.03, 1.05 | <0.001 | 1.01 | 1.01, 1.02 | <0.001 | 0.97 | 0.96, 0.98 | <0.001 | 0.92 | 0.91, 0.94 | <0.001 | 0.81 | 0.76, 0.85 | <0.001 |
| Sex |  |  |  |  |  |  |  |  |  |  |  |  |  |  |  |  |  |  |  |  |  |  |  |  |  |  |  |
| Female | — | — |  | — | — |  | — | — |  | — | — |  | — | — |  | — | — |  | — | — |  | — | — |  | — | — |  |
| Male | 0.90 | 0.46, 1.75 | 0.7 | 0.71 | 0.59, 0.87 | <0.001 | 0.86 | 0.78, 0.96 | 0.006 | 0.88 | 0.82, 0.94 | <0.001 | 0.91 | 0.86, 0.96 | <0.001 | 0.87 | 0.83, 0.91 | <0.001 | 0.92 | 0.87, 0.97 | 0.002 | 1.13 | 1.03, 1.23 | 0.009 | 1.21 | 0.97, 1.50 | 0.086 |
| Race/ethnicity |  |  |  |  |  |  |  |  |  |  |  |  |  |  |  |  |  |  |  |  |  |  |  |  |  |  |  |
| Non-Hispanic White | — | — |  | — | — |  | — | — |  | — | — |  | — | — |  | — | — |  | — | — |  | — | — |  | — | — |  |
| Non-Hispanic Black | 0.39 | 0.06, 1.36 | 0.2 | 0.17 | 0.09, 0.29 | <0.001 | 0.24 | 0.17, 0.32 | <0.001 | 0.31 | 0.26, 0.37 | <0.001 | 0.31 | 0.26, 0.35 | <0.001 | 0.36 | 0.32, 0.41 | <0.001 | 0.33 | 0.28, 0.39 | <0.001 | 0.39 | 0.29, 0.52 | <0.001 | 0.51 | 0.25, 0.91 | 0.037 |
| Sex * Race/ethnicity |  |  |  |  |  |  |  |  |  |  |  |  |  |  |  |  |  |  |  |  |  |  |  |  |  |  |  |
| Male * Non-Hispanic Black | 2.16 | 0.37, 17.0 | 0.4 | 1.98 | 0.90, 4.48 | 0.092 | 1.24 | 0.82, 1.90 | 0.3 | 0.75 | 0.55, 1.01 | 0.057 | 1.05 | 0.84, 1.32 | 0.6 | 0.83 | 0.68, 1.01 | 0.065 | 0.93 | 0.71, 1.20 | 0.6 | 0.78 | 0.48, 1.25 | 0.3 | 1.48 | 0.57, 3.75 | 0.4 |
| 1IRR = Incidence Rate Ratio, CI = Confidence Interval | | | | | | | | | | | | | | | | | | | | | | | | | | | |

**Supplementary Table 3.** Radiographically confirmed Vestibular schwannoma incidence rate ratios and 95% confidence intervals for the joint effects of sex, race and ethnicity, and their interactions from Poisson regression models stratified by 10-year age intervals. (CBTRUS: Data provided by CDC’s National Program of Cancer Registries and NCI’s Surveillance, Epidemiology and End Results Program, 2004-2021).

|  | 0-9 | | | 10-19 | | | 20-29 | | | 30-39 | | | 40-49 | | | 50-59 | | | 60-69 | | | 70-79 | | | 80+ | | |
| --- | --- | --- | --- | --- | --- | --- | --- | --- | --- | --- | --- | --- | --- | --- | --- | --- | --- | --- | --- | --- | --- | --- | --- | --- | --- | --- | --- |
| **Characteristic** | **IRR**1 | **95% CI**1 | **p-value** | **IRR**1 | **95% CI**1 | **p-value** | **IRR**1 | **95% CI**1 | **p-value** | **IRR**1 | **95% CI**1 | **p-value** | **IRR**1 | **95% CI**1 | **p-value** | **IRR**1 | **95% CI**1 | **p-value** | **IRR**1 | **95% CI**1 | **p-value** | **IRR**1 | **95% CI**1 | **p-value** | **IRR**1 | **95% CI**1 | **p-value** |
| Age | 1.27 | 1.17, 1.39 | <0.001 | 1.02 | 0.98, 1.06 | 0.4 | 1.13 | 1.11, 1.16 | <0.001 | 1.11 | 1.08, 1.12 | <0.001 | 1.08 | 1.07, 1.09 | <0.001 | 1.06 | 1.05, 1.06 | <0.001 | 1.04 | 1.03, 1.04 | <0.001 | 0.99 | 0.98, 0.99 | <0.001 | 0.88 | 0.86, 0.90 | <0.001 |
| Sex |  |  |  |  |  |  |  |  |  |  |  |  |  |  |  |  |  |  |  |  |  |  |  |  |  |  |  |
| Female | — | — |  | — | — |  | — | — |  | — | — |  | — | — |  | — | — |  | — | — |  | — | — |  | — | — |  |
| Male | 1.13 | 0.70, 1.79 | 0.6 | 0.99 | 0.77, 1.26 | 0.9 | 0.68 | 0.58, 0.82 | <0.001 | 0.84 | 0.76, 0.93 | <0.001 | 0.97 | 0.91, 1.04 | 0.4 | 0.98 | 0.94, 1.02 | 0.4 | 1.06 | 1.02, 1.09 | 0.003 | 1.12 | 1.06, 1.16 | <0.001 | 1.13 | 1.05, 1.22 | 0.002 |
| Race/ethnicity |  |  |  |  |  |  |  |  |  |  |  |  |  |  |  |  |  |  |  |  |  |  |  |  |  |  |  |
| Non-Hispanic White | — | — |  | — | — |  | — | — |  | — | — |  | — | — |  | — | — |  | — | — |  | — | — |  | — | — |  |
| Non-Hispanic Black | 0.64 | 0.25, 1.43 | 0.3 | 0.79 | 0.51, 1.17 | 0.3 | 0.41 | 0.27, 0.58 | <0.001 | 0.39 | 0.30, 0.49 | <0.001 | 0.48 | 0.41, 0.55 | <0.001 | 0.45 | 0.41, 0.51 | <0.001 | 0.47 | 0.42, 0.52 | <0.001 | 0.45 | 0.39, 0.52 | <0.001 | 0.44 | 0.37, 0.56 | <0.001 |
| Sex * Race/ethnicity |  |  |  |  |  |  |  |  |  |  |  |  |  |  |  |  |  |  |  |  |  |  |  |  |  |  |  |
| Male * Non-Hispanic Black | 1.43 | 0.48, 4.48 | 0.5 | 0.76 | 0.41, 1.42 | 0.4 | 1.00 | 0.56, 1.75 | 0.95 | 1.03 | 0.72, 1.46 | 0.90 | 0.83 | 0.66, 1.03 | 0.094 | 0.82 | 0.69, 0.97 | 0.024 | 0.85 | 0.73, 1.01 | 0.06 | 0.77 | 0.62, 0.96 | 0.023 | 1.14 | 0.78, 1.65 | 0.5 |
| 1IRR = Incidence Rate Ratio, CI = Confidence Interval | | | | | | | | | | | | | | | | | | | | | | | | | | | |

**Supplementary Table 4.** Coefficients from overall interaction model. Vestibular schwannoma incidence rate ratios and 95% confidence intervals for the joint effects of age, sex, race/ethnicity, and their interactions from Poisson regression models, overall and stratified diagnostic confirmation method. (CBTRUS: Data provided by CDC’s National Program of Cancer Registries and NCI’s Surveillance, Epidemiology and End Results Program, 2004-2021).

|  | All diagnoses | | | Microscopic confirmation | | | Radiologic confirmation only | | |
| --- | --- | --- | --- | --- | --- | --- | --- | --- | --- |
| **Characteristic** | **IRR** | **95% CI** | **p-value** | **IRR** | **95% CI** | **p-value** | **IRR** | **95% CI** | **p-value** |
| Age (years) | 1.03 | 1.03, 1.04 | <0.001 | 1.02 | 1.02, 1.02 | <0.001 | 1.05 | 1.04, 1.05 | <0.001 |
| Sex |  |  |  |  |  |  |  |  |  |
| Female | — | — |  | — | — |  | — | — |  |
| Male | 1.03 | 1.01, 1.04 | <0.001 | 0.96 | 0.93, 0.98 | <0.001 | 1.09 | 1.06, 1.11 | <0.001 |
| Race/ethnicity |  |  |  |  |  |  |  |  |  |
| NHW | — | — |  | — | — |  | — | — |  |
| NHB | 0.41 | 0.40, 0.43 | <0.001 | 0.33 | 0.31, 0.36 | <0.001 | 0.47 | 0.44, 0.50 | <0.001 |
| Sex * Race/ethnicity |  |  |  |  |  |  |  |  |  |
| Male * NHB | 0.84 | 0.78, 0.90 | <0.001 | 0.88 | 0.79, 0.98 | 0.023 | 0.81 | 0.75, 0.89 | <0.001 |
| IRR = Incidence Rate Ratio, CI = Confidence Interval | | | | | | | | | |
